# Supplementary material for: Nucleosome positions establish an extended mutation signature in melanoma
Source: PubMed Central journal article supplement (PMC6287878; doi:10.1371/journal.pgen.1007823), 2018-11-28
Supplement: pgen.1007823.s002.pdf [file pgen.1007823.s002.pdf]

Figure S2

1000 Subset  
Periodicities (bp)

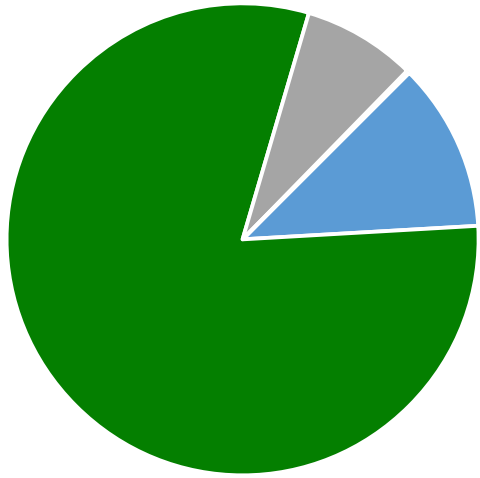

|                                                                                   | <u>Dominant<br/>Period</u> | <u>Times<br/>Observed</u> |
|-----------------------------------------------------------------------------------|----------------------------|---------------------------|
|  | 9.932                      | 115                       |
|  | 10.069                     | 799                       |
|  | 10.210                     | 77                        |
|  | 10.354                     | 1                         |
|  | 97.333                     | 8                         |
