# Supplementary material for: Nucleosome positions establish an extended mutation signature in melanoma
Source: PubMed Central journal article supplement (PMC6287878; doi:10.1371/journal.pgen.1007823), 2018-11-28

# Figure S3

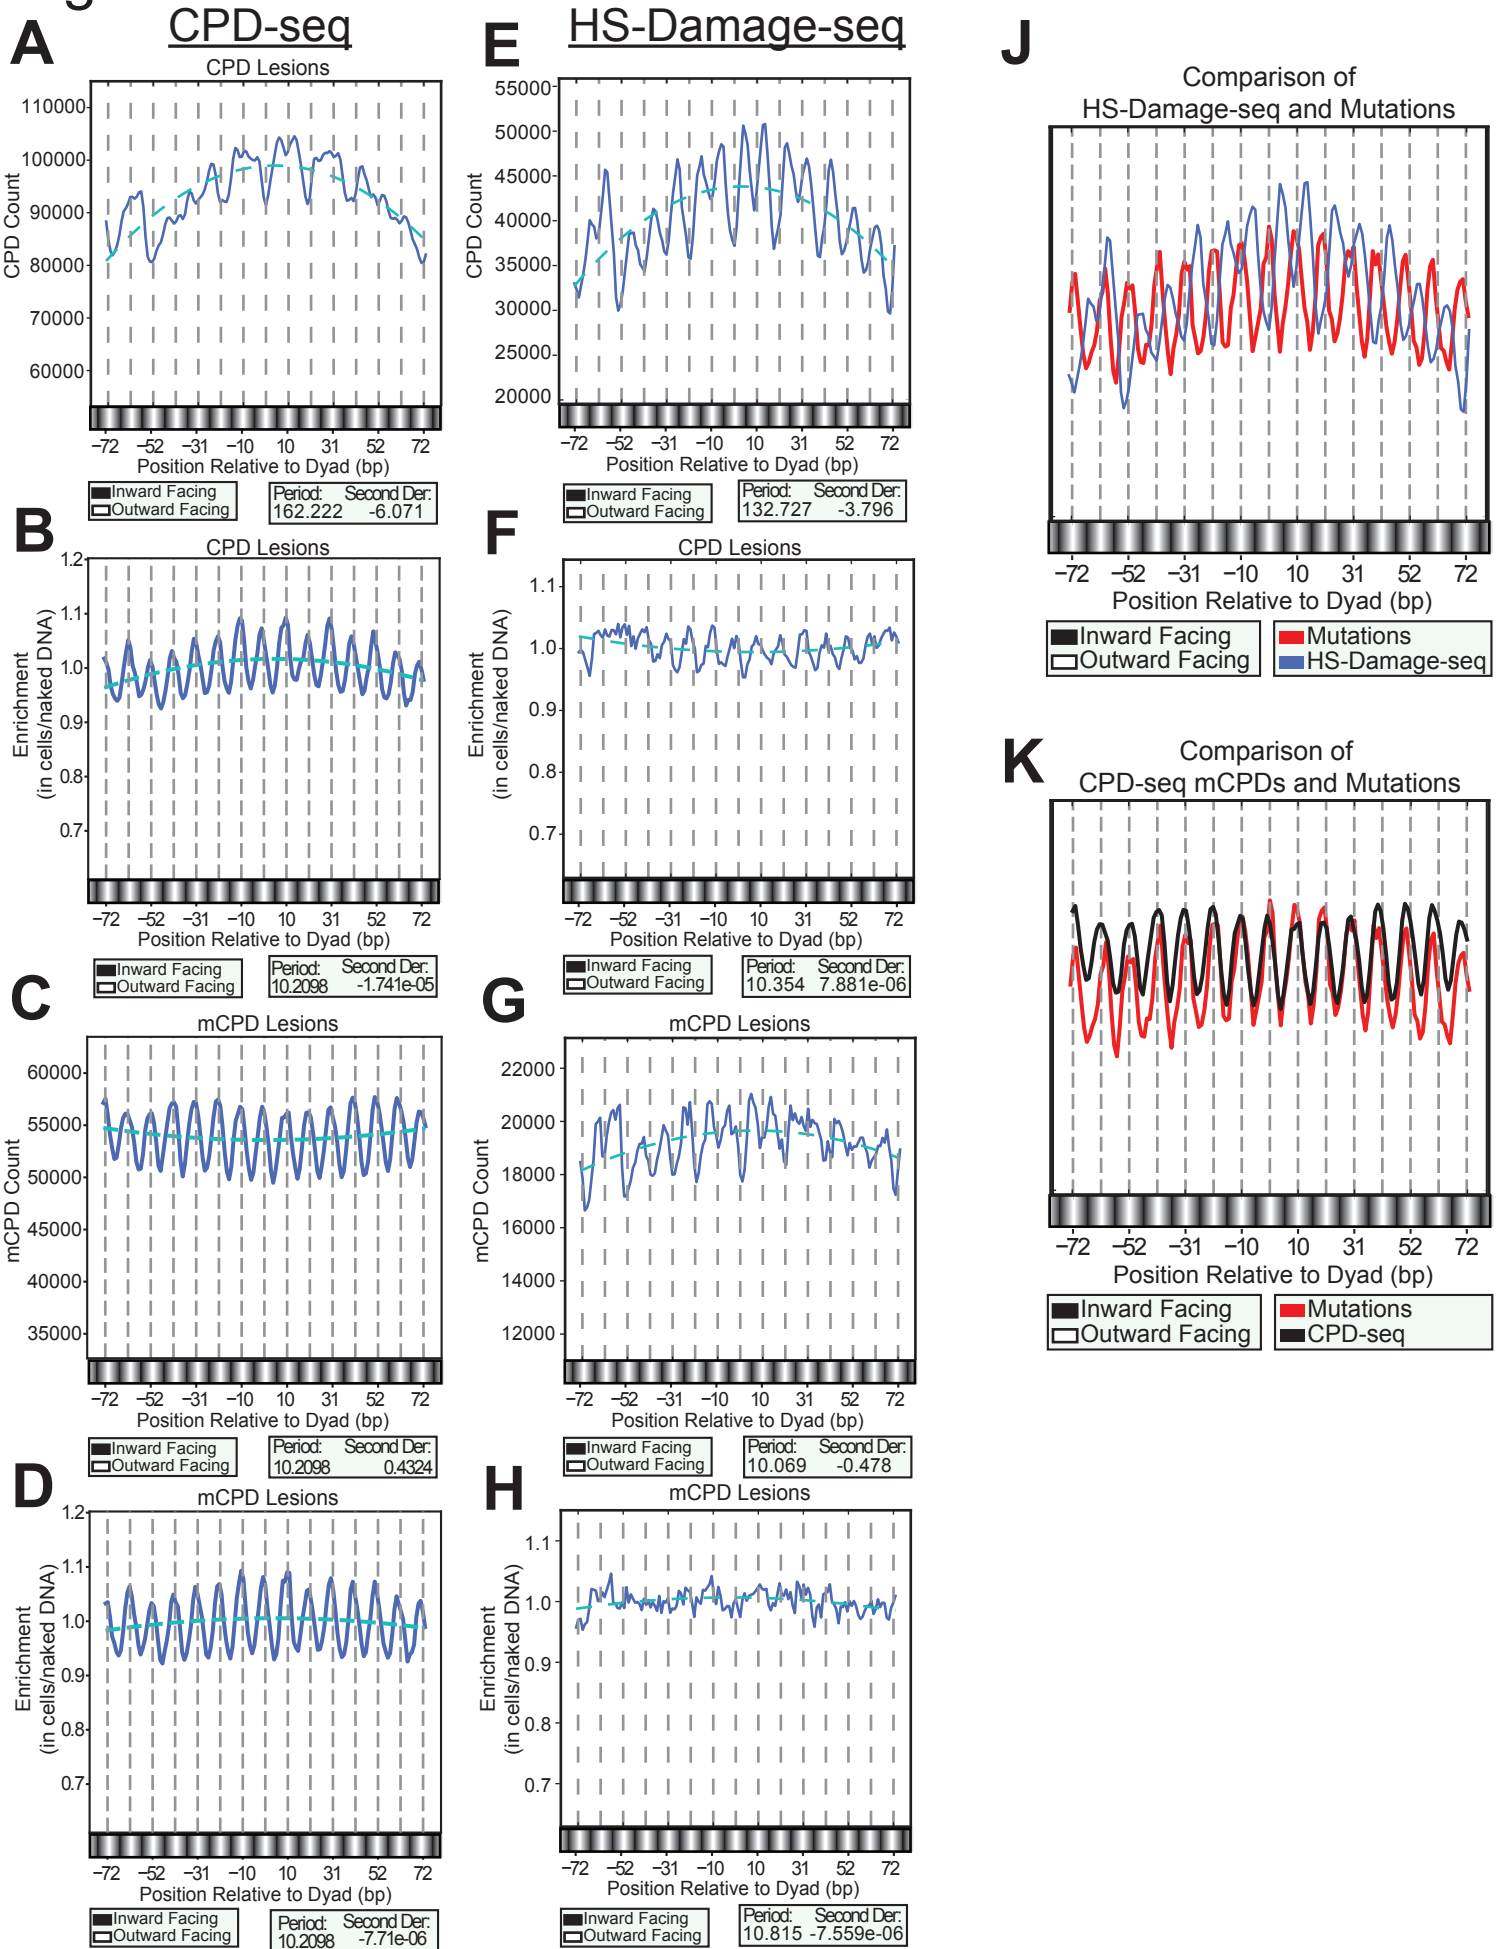

Supplement: pgen.1007823.s003.pdf [file pgen.1007823.s003.pdf]
